# Supplementary material for: MOLISENS: a modular MObile LIdar SENsor System to exploit the potential of automotive lidar for geoscientific applications
Source: Copernicus journal article supplement (doi:10.5194/gi-2022-3), 2022-02-22
Supplement: Supplementary file [file gi-2022-3-AC2-supplement.pdf]

# Referee 2

## General Comments:

This is an interesting paper presenting a methodology for developing an automotive lidar unit for use as a mobile lidar unit with geoscience applications. The manuscript does a nice job of explaining the components of the system and the testing that was done to find the applicable range and resolution. Perhaps the one component that I feel the paper is missing is a comparison of a point cloud results from the two test areas with a point cloud generated from the Riegl scanner used for the initial testing. The authors do highlight why this would be impractical for the entire area at the Lurgrotte Semriach, but even a small section would provide useful evidence for how comparable the mobile unit is to a more well-known tripod-based unit in a complex natural setting.

Dear Editor, dear reviewers,

We are very grateful for two very detailed and constructive reviews and appreciate the valuable time put into this. We believe by incorporating the reviews we managed to achieve a much more mature manuscript which we hereby submit for your consideration.

In the following we mark black the comments given by the reviewers and the editor, give our answers and comments in blue and indicate how we addressed the amendments in the manuscript in green.

Unfortunately, we had technical difficulties with MOLISENS during the measurements at Lurgrotte Semriach which were later solved (data was written on SD card not SSD and overheating of the data logger). Therefore, we have no MOLISENS data in the area where we have VZ6000 data. Nevertheless, we have a formal evaluation in section 3.2 which gives insight in the differences between the devices. We also wrote about drifts for cave measurements which still needs to be quantified already in the original version of the manuscript.

„The lack of GNSS data for cave measurements caused drifts induced by small propagating errors in the IMU data. These drifts are yet to be quantified.“

For details please also see the attached latex diff which shows all the changes.

Once again, many thanks for the valuable input and all the best – on behalf of the author team,

Thomas Gölles

## Specific Comments:

Line 24: remove “allows to build” and replace with “builds”

Done

Line 33: Three systems are mentioned (Lidar, Radar, and Camera) so remove the word "both"

Done

Line 87: I may be misunderstanding something, but here you note that the system can be powered by AC/DC adapter, but in line 91 you note that it requires external batteries to be mobile. If the appeal of this system is that it is mobile doesn't that exclude the AC/DC power option.

The system works with both: battery and power adapter. For testing and long-term observations, the power adapter option is very useful. Therefore, we left this part unchanged in the new version of the manuscript.

Table 1: I know the previous reviewer mentioned removing this table, and while I agree it may not be necessary, I do appreciate knowing the size and weight of the unit, it is much lighter than many others available, and this certainly increases the number of potential users.

We deleted Table 1 but mentioned the key specifications in the caption of Figure 1.

Line 94: please consider writing out your acronyms, in particular IMU. It was easy enough to find what this was, but for those of us not familiar with these acronyms, writing them out can be helpful for clarifying their purpose.

We use the LaTeX package glossaries, which automatically writes the long version when an acronym is used. We deleted some single use and not commonly used acronyms to reduce the number of acronyms. Also, we now use GNSS instead of GPS consistently.

Line 100: It appears that HAT is typically a capitalized acronym. Also, this could again be written out once to help clarify what it is.

This acronym was missing has been added to the manuscript.

Line 217: here it is noted that the sensor records point cloud information, yet earlier in line 173 you noted that the lidar doesn't produce the point cloud, but rather the raw data are timestamp, measurement ID, and range. I suspect these are discussing two separate steps, but there is some additional information may help clarify, as both lines appear to be discussing the Lidar sensor.

The lidar OS1-64 could also produce point cloud information directly. We changed the setup to only record raw data. We record raw data with the data logger to save storage space. Therefore, this needs a separate step to get the point cloud data with data associated to each point.

We added the following clarification into the text that we do this to store more data:

„We decided to record only raw lidar data to be able to store more data at about 1.3 million points per second...“.

Line 289: I am curious about the errors in ice. Perhaps these errors are well covered in the literature and there can be citations, but if not, maybe there can be a few more

details. I would imagine that because light can move through ice it might create some errors in the data. Perhaps this is accounted for in the lower return intensity described later, but it might be helpful to address outright how the MOLISENS system compares to others when surveying ice.

These errors are not well documented in the literature. The Ouster unit has a wavelength of 855nm as compared to the 1064nm of the VZ6000. Therefore, the reflectance of ice is higher for the Ouster unit which should potentially improve the performance. As can be seen in the following figure from my PhD thesis ([https://www.researchgate.net/publication/321526677\\_Impurities\\_of\\_glacier\\_ice\\_accumulation\\_transport\\_and\\_albedo](https://www.researchgate.net/publication/321526677_Impurities_of_glacier_ice_accumulation_transport_and_albedo)).

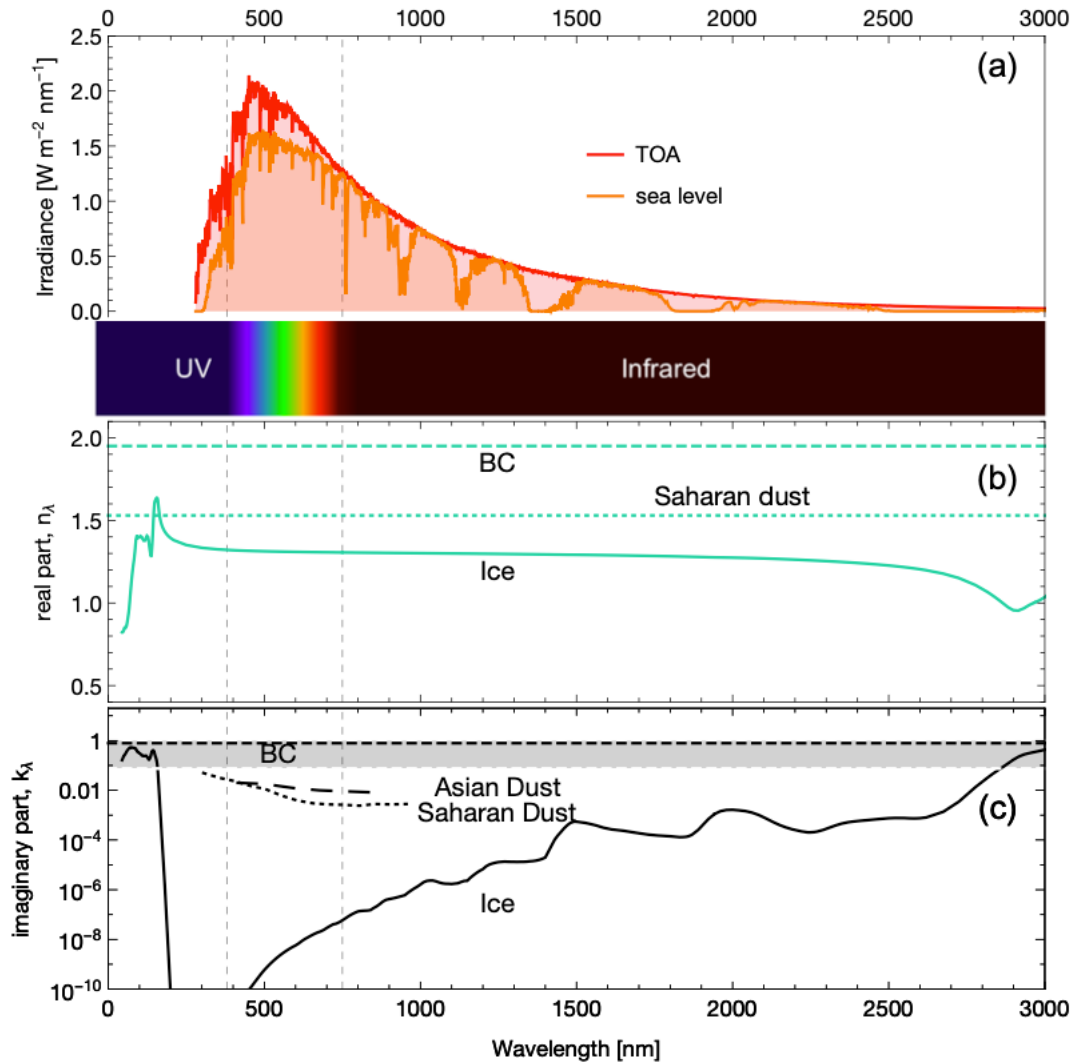

**Figure 1.3:** (a) spectral irradiance at the top of atmosphere (TOA) and sea level (ASTM International, 2012). (b) real part and (c) imaginary part of the complex refractive index. The extinction coefficient ( $k_\lambda$ ) of ice is strongly dependent on wavelength, and is very low in the visible spectrum (Warren and Brandt, 2008). The extinction coefficient of black carbon (BC) does not depend on wavelength, and the recommended value is 0.79 (Bond and Bergstrom, 2006). The exact value of BC depends on the source and range of the values is indicated in grey. Dust has a lower  $k$  than BC, shown here in examples from the Sahara (Burkina Faso, Wagner et al. (2012)) and Asia (Zhangye: 39.082°N, 100.276°E, Ge et al. (2010)).

The sentences read as follows:

“Some outlier points are visible that might be a result of the scanners range errors and the torso of the person holding the scanner. In general, the Ouster OS1-64 should perform well for glaciological applications due to the wavelength of 855nm where absorption in ice is

lower (Warren and Brandt, 2008) than at the wavelength of the VZ-6000 at 1064nm or other TLS which have a wavelength of typically 1550nm (Deems et al., 2013). Further investigations of the errors are needed in the future.”

Deems, J. S., Painter, T. H., and Finnegan, D. C.: Lidar measurement of snow depth: a review, *Journal of Glaciology*, 59, 467–479, <https://doi.org/10.3189/2013JoG12J154>, 2013.

Warren, S. G. and Brandt, R. E.: Optical constants of ice from the ultraviolet to the microwave: A revised compilation, *Journal of Geophysical Research: Atmospheres*, 113, <https://doi.org/https://doi.org/10.1029/2007JD009744>, 2008.

Line 294: There appears to be a few words missing after “These are the price, size, weight, and robustness...”, or perhaps there should be a semicolon connecting this with the previous sentence.

The sentence now reads: “These advantages are the lower price, smaller size, lower weight, and increased robustness but also the ability to acquire data in narrow spaces”

Line 324: “A useful” not “an useful”

Done

Line 329: These sentences seem to imply that the lower intensity returns for ice surfaces may be better for change detection. If this is true, could you provide more information as to why. If this isn’t meant to be implied, consider removing the word “hence”, and possibly moving this line.

We added a new sentence which could clarify what we meant by that:

„In general, surface types could be distinguished if they have a significant difference in intensity.“

Line 335: Does this line suggest that Structure from Motion (SfM) would be a preferred method of monitoring coastal bluffs? This is the first mention of SfM, it might be helpful to have a line or two about the advantages of this system in comparison that one, particularly where you might have good GPS control.

We added a completely new paragraph in the introduction mentioning SfM and how it compares to TLS. Here, we also use the acronym ‘SfM’ since it has been introduced in the introduction.

---

Line 336-339: This sounds amazing, I look forward to this technology becoming more widely accessible.

Yes.

As a general comment about the discussion and conclusions, river systems are mentioned a few times as an application for this technology, but I suspect the laser isn't powerful enough to penetrate through water. Similarly, there is no mention of multiple returns, so I suspect this isn't penetrating through vegetation. It may be worth noting these caveats specifically depending on the anticipated audience.

It is true, that the laser is not powerful enough to penetrate through water but indeed, it can be used to map or monitor the dry parts of a riverbed. We added the following sentence to section 6.1:

„Another challenging surface is water, which absorbs typical wavelengths of automotive lidar in the near- infrared (e.g. Lague, 2020). „

We added two sentences about the number of returns of automotive lidar in the introduction: “Most state-of-the-art automotive lidars provide a single return or dual returns, while some have up to five returns (Ocular Robotics Limited, 2018) and one which offers full-waveform information (LeddarTech Inc., 2021). Therefore, this limits the application of automotive lidar where multiple returns are needed, as for example for vegetation removal. „
